# Supplementary material for: Characteristic and Interplay of Esophageal Microbiota in Esophageal Squamous Cell Carcinoma
Source: Research Square preprint supplement (doi:10.21203/rs.3.rs-615147/v1), 2021-06-16
Supplement: Supplementary file 1 [file fffead211fb24d16f597908b.docx]

Table-S2. The corresponding description of the differential MetaCyc metabolic pathways.

| MetaCyc pathway | Description |
| --- | --- |
| PWY-3661 | glycine betaine degradation I |
| PWY-7431 | aromatic biogenic amine degradation (bacteria) |
| PWY-1882 | superpathway of C1 compounds oxidation to CO2 |
| PWY-5265 | peptidoglycan biosynthesis II (staphylococci) |
| PWY-6565 | superpathway of polyamine biosynthesis III |
| PWY-6731 | starch degradation III |
| PWY-6906 | chitin derivatives degradation |
| PWY-7391 | isoprene biosynthesis II (engineered) |
